# Supplementary material for: Quantitative profiling of sphingolipids in wild Cordyceps and its mycelia by using UHPLC-MS
Source: PubMed Central journal article supplement (PMC4751452; doi:10.1038/srep20870), 2016-02-12

## **Supplementary Information**

**Quantitative profiling of sphingolipids in wild Cordyceps and its mycelia by using UHPLC-MS**

**Jia-Ning Mi, Jing-Rong Wang, Zhi-Hong Jiang**

**Table S1. Identification of SPLs in wild Cordyceps and its mycelia by using UHPLC-QTOF-MS/MS**

| No.         | Name                    | Formula           | [M+H] <sup>+</sup><br>( <i>m/z</i> ) | Diff<br>(ppm) | Score        | RT<br>(min)  | ms/ms fragments ( <i>m/z</i> )                                    |
|-------------|-------------------------|-------------------|--------------------------------------|---------------|--------------|--------------|-------------------------------------------------------------------|
| <b>IS-1</b> | <b>So (d17:1)</b>       | <b>C17H35NO2</b>  | <b>286.2740</b>                      | <b>0.06</b>   | <b>99.70</b> | <b>6.37</b>  | <b>268.2627, 250.2545</b>                                         |
| 1           | So (d14:2)              | C14H27NO2         | 242.2111                             | -0.82         | 83.88        | 3.76         | 224.1996, 206.1895, 194.1887, 60.0440                             |
| 2           | So (d14:1)              | C14H29NO2         | 244.2270                             | -1.34         | 81.57        | 5.30         | 226.1296, 60.0436                                                 |
| 3           | So (d16:1)              | C16H33NO2         | 272.2578                             | -2.50         | 91.98        | 5.95         | 254.2414, 236.2334, 60.0443                                       |
| 4           | So (d17:2)              | C17H33NO2         | 284.2583                             | 1.30          | 49.53        | 7.11         | 266.2485                                                          |
| 5           | So (d18:2)              | C18H35NO2         | 298.2742                             | -3.82         | 83.03        | 9.10         | 280.2652, 60.0448                                                 |
| 6           | So (d18:1)              | C18H37NO2         | 300.2898                             | -0.05         | 99.57        | 8.07         | 282.2774, 264.2371, 60.0450                                       |
| 7           | So (t18:1)              | C18H37NO3         | 316.2850                             | -1.38         | 82.52        | 6.38         | 298.2727, 280.2623, 262.2517, 250.2525, 60.0446                   |
| 8           | So (t18:1) isomer       | C18H37NO3         | 316.2847                             | -0.28         | 81.81        | 6.90         | 298.2746, 60.0444                                                 |
| 9           | So (d20:1)              | C20H41NO2         | 328.3213                             | 0.64          | 98.97        | 9.41         | 310.3100                                                          |
| 10          | So (t22:2)              | C22H43NO3         | 370.3316                             | -0.35         | 98.90        | 7.49         | 352.3225                                                          |
| <b>IS-2</b> | <b>S1P (d17:1)</b>      | <b>C17H36NO5P</b> | <b>366.2406</b>                      | <b>-0.56</b>  | <b>99.74</b> | <b>6.55</b>  | <b>250.2536</b>                                                   |
| 11          | S1P (d18:1)             | C18H38NO5P        | 380.2564                             | 1.20          | 82.71        | 9.03         | 362.3209, 264.2659                                                |
| 12          | S1Po (d18:1)*           | C23H49N2O5P       | 467.3597                             | -5.08         | 74.93        | 6.55         | 449.3489, 184.0734                                                |
| <b>IS-3</b> | <b>Sa (d17:0)</b>       | <b>C17H37NO2</b>  | <b>288.2898</b>                      | <b>-0.09</b>  | <b>99.29</b> | <b>6.57</b>  | <b>270.2781, 252.2673, 240.2680, 60.0442</b>                      |
| 13          | Sa (d16:0)              | C16H35NO2         | 274.2740                             | -0.68         | 95.38        | 6.24         | 256.2617, 238.2522, 60.0443                                       |
| 14          | Sa (m18:0)              | C18H39NO          | 286.3105                             | 0.19          | 98.89        | 7.12         | 268.2989                                                          |
| 15          | Sa (d17:0) isomer*      | C17H37NO2         | 288.2889                             | -3.54         | 95.85        | 5.51         | 270.2784                                                          |
| 16          | Sa (d18:0)              | C18H39NO2         | 302.3048                             | -1.81         | 46.59        | 6.91         | 284.2926, 266.2819, 254.2842, 60.0439                             |
| 17          | Sa (t18:0)              | C18H39NO3         | 318.3026                             | 7.56          | 84.09        | 6.61         | 300.2883, 282.2782, 264.2683, 270.2782, 252.2670, 60.0442         |
| 18          | Sa (t18:0) isomer       | C18H39NO3         | 318.3004                             | -0.40         | 99.04        | 6.32         | 300.2888, 288.2772, 270.2790                                      |
| <b>IS-4</b> | <b>Cer (d18:1/12:0)</b> | <b>C30H59NO3</b>  | <b>482.4565</b>                      | <b>-1.59</b>  | <b>92.99</b> | <b>10.96</b> | <b>464.4431, 446.4281, 434.4308, 282.2786, 264.2678, 252.2671</b> |
| 19          | Cer (d14:1/22:0)        | C36H71NO3         | 566.5468                             | -6.53         | 55.89        | 14.64        | 548.5263, 530.5278, 518.5263, 226.2156,                           |

|    |                   |           |          |       |       |       |                                                                        |
|----|-------------------|-----------|----------|-------|-------|-------|------------------------------------------------------------------------|
|    |                   |           |          |       |       |       | 208.2054, 196.2049, 60.0442                                            |
| 20 | Cer (d18:1/2:0)*  | C20H39NO3 | 342.3000 | 1.50  | 91.72 | 9.04  | 264.2606                                                               |
| 21 | Cer (d18:1/14:2)  | C32H59NO3 | 506.4574 | 0.06  | 93.77 | 11.06 | 282.2837, 264.2675, 60.0617                                            |
| 22 | Cer (d18:1/14:1)  | C32H61NO3 | 508.4715 | -1.59 | 96.56 | 11.15 | 264.2723                                                               |
| 23 | Cer (d18:1/14:0)  | C32H63NO3 | 510.4878 | -1.20 | 96.55 | 11.85 | 492.4738, 474.4603, 462.4662, 282.2777,<br>264.2673, 252.2662, 60.0435 |
| 24 | Cer (d18:1/15:0)  | C33H65NO3 | 524.5042 | 0.39  | 97.66 | 12.33 | 506.4927, 488.4815, 282.2796, 264.2687,<br>252.2678, 60.0444           |
| 25 | Cer (d18:1/16:2)  | C34H63NO3 | 534.4880 | 0.38  | 97.77 | 11.84 | 282.2789, 264.2685, 252.2686                                           |
| 26 | Cer (d18:1/16:1)  | C34H65NO3 | 536.5042 | 0.36  | 94.85 | 12.43 | 518.493, 506.4931, 488.4800, 282.2795,<br>264.2691, 252.2691, 60.0447  |
| 27 | Cer (d18:1/16:0)  | C34H67NO3 | 538.5204 | 1.72  | 98.10 | 12.92 | 520.4758, 502.4667, 282.2624, 264.2530,<br>252.2530, 60.0412           |
| 28 | Cer (d18:1/17:1)  | C35H67NO3 | 550.5185 | -0.65 | 98.47 | 13.03 | 300.2898, 282.2742, 264.2661, 60.0437                                  |
| 29 | Cer (d18:1/18:2)  | C36H67NO3 | 562.5183 | -1.90 | 97.30 | 13.45 | 544.5042, 300.2883, 282.2783, 264.2674,<br>252.2687, 60.0446           |
| 30 | Cer (d18:1/18:1)  | C36H69NO3 | 564.5353 | 0.50  | 99.81 | 13.57 | 548.5343, 530.4838, 300.2836, 282.2760,<br>264.2643, 252.2700, 60.0442 |
| 31 | Cer (d18:1/18:0)  | C36H71NO3 | 566.5486 | -2.80 | 67.90 | 14.36 | 548.5343, 518.5343, 282.2788, 264.2708,<br>252.2720, 60.0450           |
| 32 | Cer (d18:1/20:1)  | C38H73NO4 | 592.5713 | 7.76  | 73.80 | 15.86 | 556.5546, 282.2793, 264.2689, 252.2685,<br>60.0443                     |
| 33 | Cer (d18:1/22:0)  | C40H79NO3 | 622.6127 | -1.42 | 96.67 | 18.20 | 604.5998, 586.5841, 300.2889, 282.2779,<br>264.2680, 252.2672, 60.0441 |
| 34 | Cer (d18:1/23:0)* | C41H81NO3 | 636.6274 | -2.36 | 94.37 | 19.10 | 618.6192, 600.6006, 300.2886, 282.2778,<br>264.2695, 252.2668, 60.0441 |
| 35 | Cer (d18:1/24:0)* | C42H83NO3 | 650.6433 | -2.38 | 94.72 | 20.10 | 632.6333, 614.6204, 300.2887, 282.2806,<br>264.2690, 252.2727, 60.0441 |
| 36 | Cer (d18:1/25:0)  | C43H85NO3 | 664.6585 | -3.59 | 74.25 | 19.25 | 300.2901, 282.2772, 264.2687, 252.2648,                                |

|    |                      |           |          |       |       |       |                                                                                         |
|----|----------------------|-----------|----------|-------|-------|-------|-----------------------------------------------------------------------------------------|
|    |                      |           |          |       |       |       | 60.0434                                                                                 |
| 37 | Cer (d18:1/26:1)     | C44H85NO3 | 676.6589 | -2.30 | 72.91 | 19.23 | 300.2924, 282.2786, 264.2682, 252.2685, 60.0435                                         |
| 38 | Cer (d18:2/15:0)     | C33H63NO3 | 522.4881 | -0.99 | 96.90 | 11.83 | 504.4757, 486.4644, 474.4622, 280.2621, 262.2525, 250.2525, 60.0437                     |
| 39 | Cer (d18:2/16:1)     | C34H63NO3 | 534.4887 | 1.13  | 46.93 | 11.85 | 516.4747, 280.2627, 262.2520, 250.2527, 60.0448                                         |
| 40 | Cer (d18:2/16:0)     | C34H65NO3 | 536.5047 | 1.63  | 98.33 | 12.38 | 518.5032, 500.4807, 488.4866, 280.2630, 262.2528, 250.2523, 60.0446                     |
| 41 | Cer (d18:2/18:1)     | C36H67NO3 | 562.5183 | -1.90 | 97.30 | 13.50 | 544.5027, 298.2732, 280.2608, 262.2517, 60.0443                                         |
| 42 | Cer (d18:2/23:0)     | C41H79NO3 | 634.6120 | -2.61 | 90.40 | 18.18 | 616.6017, 598.6093, 298.2733, 280.2624, 262.2523, 250.2508, 60.0446                     |
| 43 | Cer (d18:2/24:0)*    | C42H81NO3 | 648.6282 | -1.20 | 96.21 | 19.06 | 630.6151, 612.5993, 298.2729, 280.2626, 262.2522, 250.2522, 60.0443                     |
| 44 | Cer (d19:2/16:0)     | C35H67NO3 | 550.5180 | -2.66 | 95.77 | 12.76 | 532.5053, 514.4940, 502.4963, 294.2781, 276.2676, 264.2679, 60.0441                     |
| 45 | Cer (d18:1/16:1(OH)) | C34H65NO4 | 552.4987 | 0.18  | 93.34 | 12.32 | 534.4662, 516.4655, 282.2793, 264.2690, 252.2664, 60.0434                               |
| 46 | Cer (d18:1/16:0(OH)) | C34H67NO4 | 554.5137 | -1.09 | 98.26 | 12.40 | 536.4763, 518.4844, 500.4834, 318.2981, 300.2877, 282.2777, 264.2676, 252.2678, 60.0442 |
| 47 | Cer (d18:1/17:1(OH)) | C35H67NO4 | 566.5138 | -0.88 | 97.50 | 15.36 | 548.5389, 530.5290, 300.2885, 282.2786, 264.2678, 252.2676, 60.0442                     |
| 48 | Cer (d18:1/18:1(OH)) | C36H69NO4 | 580.5215 | 1.79  | 89.58 | 14.53 | 562.5497, 532.3500, 282.2766, 264.2688, 252.2640, 60.0421                               |
| 49 | Cer (d18:1/18:0(OH)) | C36H71NO4 | 582.5455 | 0.20  | 85.70 | 13.55 | 564.2850, 534.1585, 282.2805, 264.2682, 252.2677, 60.0442                               |
| 50 | Cer (d18:1/19:1(OH)) | C37H71NO4 | 594.5424 | -4.67 | 81.99 | 12.55 | 282.2656, 264.2670, 252.2348, 60.0452                                                   |

|    |                       |           |          |       |       |       |                                                                                                   |
|----|-----------------------|-----------|----------|-------|-------|-------|---------------------------------------------------------------------------------------------------|
| 51 | Cer (d18:1/22:0(OH))* | C40H79NO4 | 638.6089 | 1.10  | 98.65 | 17.11 | 620.5936, 602.5772, 300.2884, 282.2769, 264.2676, 252.2644, 60.0443                               |
| 52 | Cer (d18:2/16:0(OH))  | C34H65NO4 | 552.4991 | 0.91  | 84.54 | 11.84 | 534.4955, 516.4797, 298.2779, 280.2621, 262.2527, 250.2495, 60.0449                               |
| 53 | Cer (d18:2/18:1(OH))  | C36H67NO4 | 578.5137 | -1.04 | 88.31 | 11.52 | 560.5017, 542.4887, 524.4798, 512.4791, 316.2824, 298.2728, 280.2623, 262.2518, 250.2508, 60.0441 |
| 54 | Cer (d19:2/16:0(OH))  | C35H67NO4 | 566.5167 | 3.22  | 90.99 | 12.20 | 566.5060, 548.5021, 530.4916, 294.2780, 276.2684, 264.2693, 60.0436                               |
| 55 | Cer (d18:0/15:0)*     | C33H67NO3 | 526.5185 | -1.58 | 49.26 | 12.75 | 508.5046, 490.4941, 284.2962, 266.2840, 254.2827, 60.0441                                         |
| 56 | Cer (d18:0/16:1)      | C34H67NO3 | 538.5194 | 0.01  | 94.87 | 13.23 | 520.4573, 502.4465, 302.2804, 284.2702, 266.2606, 254.2210, 60.0398                               |
| 57 | Cer (d18:0/16:0)      | C34H69NO3 | 540.5350 | 0.02  | 47.62 | 13.35 | 522.5168, 504.5167, 302.3034, 284.2930, 266.2819, 254.2848, 60.0442                               |
| 58 | Cer (d18:0/18:0)      | C36H73NO3 | 568.5660 | -0.53 | 97.48 | 14.63 | 550.5549, 532.5356, 302.3041, 284.2927, 266.2838, 254.2854, 60.0439                               |
| 59 | Cer (d18:0/26:0)*     | C44H89NO3 | 680.6932 | 2.63  | 95.31 | 20.82 | 662.6779, 644.6688, 302.3044, 284.2943, 266.2837, 254.2835, 60.0443                               |
| 60 | Cer (t18:1/18:0)      | C36H71NO4 | 582.5454 | -2.78 | 87.05 | 12.99 | 564.5238, 546.5252, 280.2609, 262.2535, 250.2525, 60.044                                          |
| 61 | Cer (t18:1/22:1)*     | C40H77NO4 | 636.5916 | -1.41 | 97.00 | 16.15 | 618.5775, 600.5669, 316.2958, 298.2726, 280.2620, 262.2527, 250.2512, 60.0442                     |
| 62 | Cer (t18:1/22:0)      | C40H79NO4 | 638.6075 | -1.72 | 95.50 | 15.64 | 620.5942, 602.5830, 584.5657, 316.2827, 298.2730, 280.2626, 262.2522, 250.2507, 60.0443           |
| 63 | Cer (t18:0/16:0)      | C34H69NO4 | 556.5283 | -3.49 | 47.41 | 12.28 | 282.2782, 264.2673, 252.2681, 60.0443                                                             |
| 64 | Cer (t18:0/22:1)      | C40H79NO4 | 638.6066 | -2.51 | 92.94 | 16.12 | 620.5912, 602.5785, 318.2885, 282.2785, 264.2677, 252.2681, 60.0443                               |

|             |                            |                  |                 |              |              |              |                                                                                                   |
|-------------|----------------------------|------------------|-----------------|--------------|--------------|--------------|---------------------------------------------------------------------------------------------------|
| 65          | Cer (t18:0/22:0)           | C40H81NO4        | 640.6224        | -2.61        | 95.18        | 16.13        | 622.6117, 604.6000, 318.3000, 300.2895, 282.2789, 264.2680, 252.2677, 60.0445                     |
| 66          | Cer (t18:0/24:0)           | C42H85NO4        | 668.6558        | 1.30         | 98.39        | 17.45        | 650.6451, 632.6331, 614.6217, 318.3005, 300.2900, 282.2792, 264.2687, 252.2685, 60.0446           |
| 67          | Cer (t18:0/18:0(OH))       | C36H73NO5        | 600.5558        | -1.30        | 96.81        | 12.98        | 582.5451, 564.5357, 546.5223, 534.5204, 318.3015, 300.2895, 282.2799, 264.2693, 252.2686, 60.045  |
| 68          | Cer (t18:0/22:0(OH))       | C40H81NO5        | 656.6183        | -1.13        | 97.91        | 15.48        | 638.6032, 620.5948, 602.5856, 318.2980, 300.2891, 282.2780, 264.2676, 252.2673, 60.0441           |
| 69          | Cer (t18:0/24:0(OH))       | C42H85NO5        | 684.6709        | 3.48         | 52.12        | 16.83        | 666.6481, 648.6362, 630.6249, 612.6156, 318.3042, 300.2934, 282.2830, 264.2720, 252.2713, 60.0454 |
| <b>IS-5</b> | <b>GlcCer (d18:1/12:0)</b> | <b>C36H69NO8</b> | <b>644.5116</b> | <b>-0.11</b> | <b>99.98</b> | <b>10.40</b> | <b>264.2684, 60.0441</b>                                                                          |
| 70          | HexCer (d18:1/16:0)*       | C40H77NO8        | 700.5704        | -2.69        | 93.97        | 12.21        | 682.5608, 664.5436, 520.5076, 502.4982, 490.4893, 282.2788, 264.2683, 252.2698, 60.0445           |
| 71          | HexCer (d18:2/16:0)        | C40H75NO8        | 698.5573        | 1.27         | 86.87        | 11.52        | 680.5461, 536.5047, 518.4944, 500.4838, 280.2669, 262.2535, 250.2535                              |
| 72          | HexCer (d18:2/16:0(OH))    | C40H75NO9        | 714.5522        | 0.55         | 97.12        | 11.25        | 696.5392, 534.4879, 516.4774, 504.477, 280.2636, 262.2532, 250.2534, 60.0455                      |
| 73          | HexCer (d19:2/15:0)        | C40H75NO8        | 698.5555        | -1.43        | 94.75        | 11.46        | 680.4951, 662.6058, 536.4120, 518.4675, 294.2805, 276.2660, 264.2522, 60.0440                     |
| 74          | HexCer (d19:2/16:0(OH))    | C41H77NO9        | 728.5679        | 1.05         | 86.31        | 11.75        | 710.5562, 692.5422, 566.5138, 548.5038, 530.4929, 518.4936, 294.2794, 276.2691, 264.2694, 60.0447 |
| 75          | HexCer (d19:2/17:0(OH))*   | C42H79NO9        | 742.5842        | 1.87         | 94.85        | 12.00        | 724.5716, 562.5191, 544.5080, 532.5108, 294.2787, 276.2696, 60.0451                               |

|             |                          |                    |                 |             |              |              |                                                                                                                             |
|-------------|--------------------------|--------------------|-----------------|-------------|--------------|--------------|-----------------------------------------------------------------------------------------------------------------------------|
| 76          | HexCer (d19:2/18:0(OH))  | C43H81NO9          | 756.5992        | 0.21        | 96.54        | 12.53        | 738.5863, 576.5335, 558.5236, 546.5249,<br>294.2788, 276.2689, 264.2686, 60.0447<br>710.5435, 692.5330, 548.4912, 530.4811, |
| 77          | HexCer (t19:1/16:1)      | C41H77NO9          | 728.5678        | 0.82        | 98.38        | 11.20        | 512.4701, 330.2718, 312.2484, 294.2775,<br>276.2677, 60.0441                                                                |
| <b>IS-6</b> | <b>SM (d18:1/12:0)</b>   | <b>C35H71N2O6P</b> | <b>647.5119</b> | <b>2.88</b> | <b>89.65</b> | <b>10.37</b> | <b>282.2788, 264.2672, 184.0742</b>                                                                                         |
| 78          | SM (d18:1/14:0)          | C37H75N2O6P        | 675.5435        | -0.31       | 99.53        | 11.10        | 264.2628, 184.0733                                                                                                          |
| 79          | SM (d18:1/16:0)          | C39H79N2O6P        | 703.5773        | 3.43        | 87.95        | 12.00        | 264.2723, 184.0738                                                                                                          |
| 80          | SM (d18:1/18:0)          | C41H83N2O6P        | 731.6061        | 0.01        | 99.51        | 13.25        | 264.2670, 184.0732                                                                                                          |
| 81          | SM (d18:1/20:0)          | C43H87N2O6P        | 759.6377        | 0.06        | 99.42        | 14.51        | 264.2675, 184.0731                                                                                                          |
| 82          | SM (d18:1/22:0)          | C45H91N2O6P        | 787.6679        | -1.82       | 93.87        | 15.61        | 264.2642, 184.074                                                                                                           |
| 83          | SM (d18:1/24:0)          | C47H95N2O6P        | 815.6937        | -7.51       | 66.52        | 16.91        | 264.2616, 184.0717                                                                                                          |
| 84          | SM (d18:1/16:1)          | C39H77N2O6P        | 701.5586        | -0.56       | 99.03        | 11.66        | 264.2670, 184.0733                                                                                                          |
| 85          | SM (d18:1/20:1)          | C43H85N2O6P        | 757.6234        | 2.11        | 95.74        | 13.90        | 264.2676, 184.0726                                                                                                          |
| 86          | SM (d18:1/22:1)          | C45H89N2O6P        | 785.6519        | -2.62       | 85.23        | 15.12        | 264.2686, 184.0741                                                                                                          |
| 87          | SM (d18:2/18:0)          | C41H81N2O6P        | 729.5895        | -2.38       | 81.30        | 12.75        | 262.2550, 184.0738                                                                                                          |
| 88          | SM (d18:2/18:1)          | C41H79N2O6P        | 727.5733        | -3.23       | 89.12        | 11.81        | 262.2520, 184.0729                                                                                                          |
| 89          | SM (d18:1/18:1(OH))      | C41H81N2O7P        | 745.5853        | -0.49       | 94.97        | 12.38        | 264.2709, 184.0737                                                                                                          |
| 90          | SM (d18:2/16:0(OH))      | C39H77N2O7P        | 717.5546        | 0.34        | 70.39        | 11.07        | 262.2531, 184.0738                                                                                                          |
| 91          | SM (d33:1)               | C38H77N2O6P        | 689.5578        | -1.61       | 93.11        | 11.56        | 184.0728                                                                                                                    |
| 92          | SM (d39:2)               | C44H87N2O6P        | 771.6349        | -4.65       | 72.19        | 14.56        | 184.0726                                                                                                                    |
| 93          | SM (d42:2)               | C47H93N2O6P        | 813.6809        | -5.03       | 78.04        | 16.14        | 184.0734                                                                                                                    |
| 94          | SM (d34:0)               | C39H81N2O6P        | 705.5906        | 0.19        | 99.72        | 12.50        | 184.0732                                                                                                                    |
| 95          | SM (d36:0)               | C41H85N2O6P        | 733.6209        | -1.32       | 96.37        | 13.84        | 184.0734                                                                                                                    |
| 96          | SM (d38:0)               | C43H89N2O6P        | 761.6523        | -1.98       | 91.96        | 14.90        | 184.0728                                                                                                                    |
| 97          | PI-Cer (d18:0/16:0(OH))* | C40H80NO12P        | 798.5494        | 0.38        | 91.30        | 10.90        | 780.5319, 556.5266, 538.5169, 520.5078,<br>284.2930, 266.2852, 60.0425                                                      |
| 98          | PI-Cer (t18:0/22:0(OH))  | C46H92NO13P        | 898.6364        | -1.67       | 96.77        | 12.84        | 880.6528, 666.6358, 638.6056, 620.5907,<br>602.4465, 300.2888, 282.2773, 264.2655,                                          |

|     |                         |              |           |       |       |       |                                                                                                                              |
|-----|-------------------------|--------------|-----------|-------|-------|-------|------------------------------------------------------------------------------------------------------------------------------|
| 99  | PI-Cer (t18:0/24:0(OH)) | C48H96NO13P  | 926.6692  | 0.01  | 98.13 | 13.95 | 252.2662, 60.0443<br>908.6490, 684.6483, 666.6362, 648.6261,<br>630.6105, 300.2882, 282.2777, 264.2674,<br>252.2677, 60.0442 |
| 100 | MIPC (t18:0/22:0(OH))   | C52H102NO18P | 1060.6880 | -2.55 | 91.03 | 12.60 | 1042.5295, 898.6364, 880.6253, 656.6104,<br>638.6042, 300.2909, 282.2738, 264.2668,<br>60.0447                               |
| 101 | MIPC (t18:0/24:0(OH))   | C54H106NO18P | 1088.7205 | -1.36 | 95.15 | 13.68 | 926.9604, 666.6345, 648.6163, 300.2877,<br>282.2777, 264.2664, 60.0445                                                       |

---

\* Sphingolipids were identified from mycelia only.



Table S2. The level of representative markers discriminating wild Cordyceps and its mycelia.

| Group A V.S. Group B                                              | SPLs                    | VIP  | Group A       | Group B       | <i>p</i> |
|-------------------------------------------------------------------|-------------------------|------|---------------|---------------|----------|
| Wild Cordyceps V.S.<br><i>Hirsutella sinensis</i>                 | HexCer (t19:1/16:1)     | 1.38 | 0.715 ±0.120  | 4.416 ±0.619  | 0.0000   |
|                                                                   | HexCer (d19:2/16:0(OH)) | 1.37 | 0.958 ±0.289  | 5.436 ±0.638  | 0.0000   |
|                                                                   | So (d18:1)              | 1.35 | 0.493 ±0.268  | 3.023 ±0.423  | 0.0000   |
| Wild Cordyceps V.S.<br><i>Cordyceps sinensis</i>                  | Sa (d16:0)              | 1.41 | 0.013 ±0.013  | 12.732 ±0.724 | 0.0000   |
|                                                                   | HexCer (d19:2/16:0(OH)) | 1.40 | 0.958 ±0.289  | 10.203 ±1.147 | 0.0000   |
|                                                                   | PI-Cer (d18:0/16:0(OH)) | 1.40 | 0             | 6.977 ±1.505  | 0.0000   |
| Wild Cordyceps V.S.<br><i>Cephalosporium sinensis</i>             | SM (d18:2/16:0(OH))     | 1.46 | 0.419 ±0.058  | 0.017 ±0.031  | 0.0000   |
|                                                                   | Cer (d18:1/18:1)        | 1.45 | 0.074 ±0.069  | 12.008 ±2.387 | 0.0000   |
|                                                                   | Cer (d18:0/18:0)        | 1.40 | 0.008 ±0.006  | 9.885 ±3.149  | 0.0000   |
| Wild Cordyceps V.S.<br><i>Mortierella SP</i>                      | Cer (d18:0/16:1)        | 1.41 | 0.031 ±0.025  | 0.616 ±0.110  | 0.0000   |
|                                                                   | SM (d18:2/18:0)         | 1.40 | 10.426 ±2.543 | 0.145 ±0.051  | 0.0000   |
|                                                                   | SM (d18:2/16:0(OH))     | 1.37 | 0.419 ±0.058  | 0.054 ±0.016  | 0.0000   |
| Wild Cordyceps V.S.<br><i>Gliocadium roseum</i>                   | Cer (d18:1/18:1)        | 1.45 | 0.074 ±0.069  | 13.455 ±0.594 | 0.0000   |
|                                                                   | Sa (d16:0)              | 1.44 | 0.013 ±0.013  | 0.211 ±0.005  | 0.0000   |
|                                                                   | Sa (m18:0)              | 1.44 | 0.046 ±0.011  | 0.283 ±0.024  | 0.0002   |
| <i>Hirsutella sinensis</i> V.S.<br><i>Cordyceps sinensis</i>      | Sa (d16:0)              | 1.28 | 0.014 ±0.006  | 12.732 ±0.724 | 0.0000   |
|                                                                   | So (t22:2)              | 1.28 | 0.252 ±0.071  | 10.170 ±0.732 | 0.0000   |
|                                                                   | So (d20:1)              | 1.27 | 2.329 ±0.583  | 12.913 ±0.829 | 0.0000   |
| <i>Hirsutella sinensis</i> V.S.<br><i>Cephalosporium sinensis</i> | Cer (d18:1/16:1)        | 1.42 | 12.510 ±1.138 | 1.109 ±0.309  | 0.0000   |
|                                                                   | HexCer (d19:2/16:0(OH)) | 1.37 | 5.436 ±0.638  | 0.547 ±0.802  | 0.0000   |
|                                                                   | Cer (d18:1/18:1)        | 1.36 | 1.227 ±0.845  | 12.008 ±2.387 | 0.0000   |
| <i>Hirsutella sinensis</i> V.S.<br><i>Mortierella SP</i>          | HexCer (t19:1/16:1)     | 1.41 | 4.416 ±0.619  | 0.056 ±0.018  | 0.0000   |
|                                                                   | Cer (d18:2/18:1)        | 1.39 | 0.009 ±0.005  | 0.543 ±0.083  | 0.0000   |
|                                                                   | SM (d14:1/20:0)         | 1.35 | 11.618 ±2.342 | 1.080 ±0.410  | 0.0000   |
| <i>Hirsutella sinensis</i> V.S.<br><i>Gliocadium roseum</i>       | Sa (d16:0)              | 1.41 | 0.014 ±0.006  | 0.211 ±0.005  | 0.0000   |
|                                                                   | Sa (t18:0)              | 1.41 | 0.107 ±0.049  | 4.544 ±0.177  | 0.0000   |
|                                                                   | Cer (d18:1/18:1)        | 1.41 | 1.227 ±0.845  | 13.455 ±0.594 | 0.0000   |
| <i>Cordyceps sinensis</i> V.S.<br><i>Cephalosporium sinensis</i>  | Sa (d16:0)              | 1.56 | 12.732 ±0.724 | 0.33 ±0.174   | 0.0000   |
|                                                                   | Cer (d19:2/16:0(OH))    | 1.56 | 10.203 ±1.147 | 0.547 ±0.802  | 0.0000   |
|                                                                   | Cer (d18:1/16:1)        | 1.55 | 11.865 ±1.381 | 1.109 ±0.309  | 0.0000   |
| <i>Cordyceps sinensis</i> V.S.<br><i>Mortierella SP</i>           | Sa (d16:0)              | 1.43 | 12.732 ±0.724 | 0.068 ±0.033  | 0.0000   |
|                                                                   | Cer (d19:2/16:0(OH))    | 1.41 | 10.203 ±1.147 | 3.820 ±2.451  | 0.0001   |
|                                                                   | Cer (d18:2/18:1)        | 1.38 | 0.118 ±0.035  | 0.543 ±0.083  | 0.0000   |
| <i>Cordyceps sinensis</i> V.S.<br><i>Gliocadium roseum</i>        | Cer (d18:1/18:1)        | 1.28 | 0.446 ±0.396  | 13.455 ±0.594 | 0.0000   |
|                                                                   | Sa (t18:0)              | 1.28 | 0.674 ±0.121  | 4.544 ±0.177  | 0.0000   |
|                                                                   | Sa (t18:0) isomer       | 1.28 | 2.373 ±0.210  | 10.881 ±0.455 | 0.0000   |
| <i>Cephalosporium sinensis</i><br>V.S. <i>Mortierella SP</i>      | Cer (d18:2/16:1)        | 1.76 | 1.008 ±0.299  | 2.350 ±0.452  | 0.0000   |
|                                                                   | Cer (d18:1/18:1)        | 1.74 | 12.008 ±2.387 | 3.823 ±1.802  | 0.0000   |
|                                                                   | So (d16:1)              | 1.70 | 0.375 ±0.223  | 1.317 ±0.340  | 0.0000   |

|                                                                 |                  |      |              |              |        |
|-----------------------------------------------------------------|------------------|------|--------------|--------------|--------|
| <i>Cephalosporium sinensis</i><br>V.S. <i>Gliocadium roseum</i> | Sa (t18:0)       | 1.90 | 0.261 ±0.121 | 4.544 ±0.177 | 0.0000 |
|                                                                 | So (t18:1)       | 1.88 | 0.107 ±0.062 | 0.929 ±0.065 | 0.0000 |
|                                                                 | Cer (d18:1/14:1) | 1.81 | 0.053 ±0.016 | 0.141 ±0.004 | 0.0000 |
| <i>Mortierella SP</i> V.S.<br><i>Gliocadium roseum</i>          | Sa (t18:0)       | 1.41 | 0.392 ±0.096 | 4.544 ±0.177 | 0.0000 |
|                                                                 | So (t18:1)       | 1.39 | 0.196 ±0.078 | 0.929 ±0.065 | 0.0000 |
|                                                                 | Cer (d18:2/18:1) | 1.36 | 0.543 ±0.083 | 0.029 ±0.018 | 0.0000 |

Figure S1. Linear correlation of the spiked amounts with determined amounts of SPL standards.

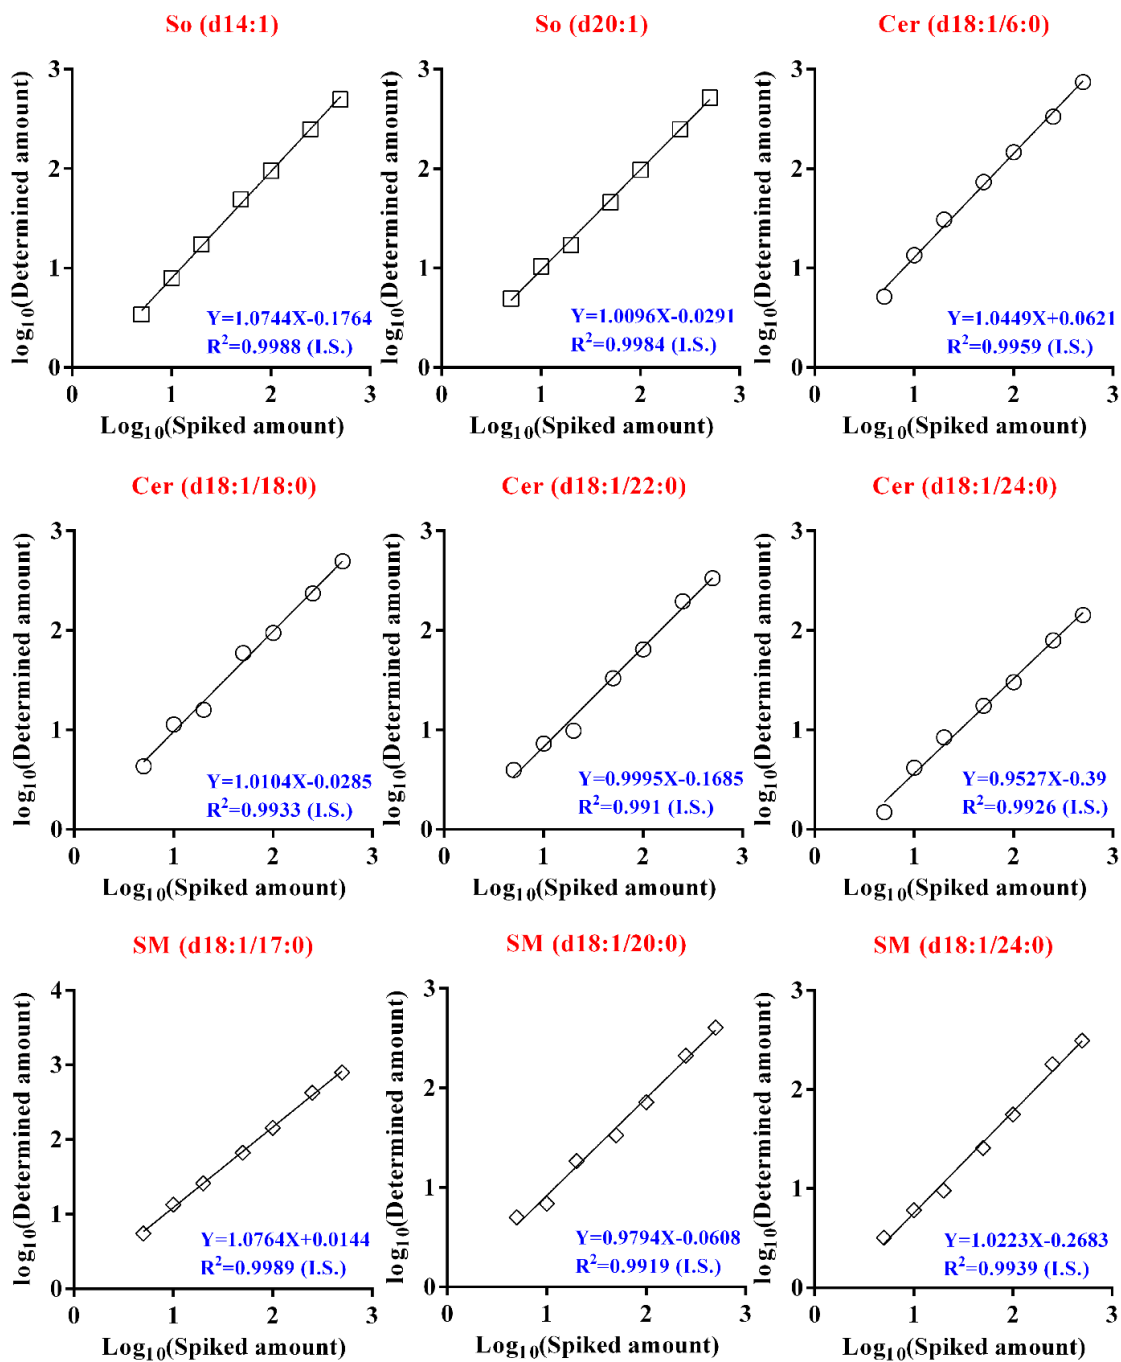

Figure S2. The total levels of four subclasses of ceramides (A, each bar represents mean  $\pm$  SD) and the levels of 51 ceramides (B, each bar represents mean value of individual ceramides) in wild Cordyceps and its mycelia.

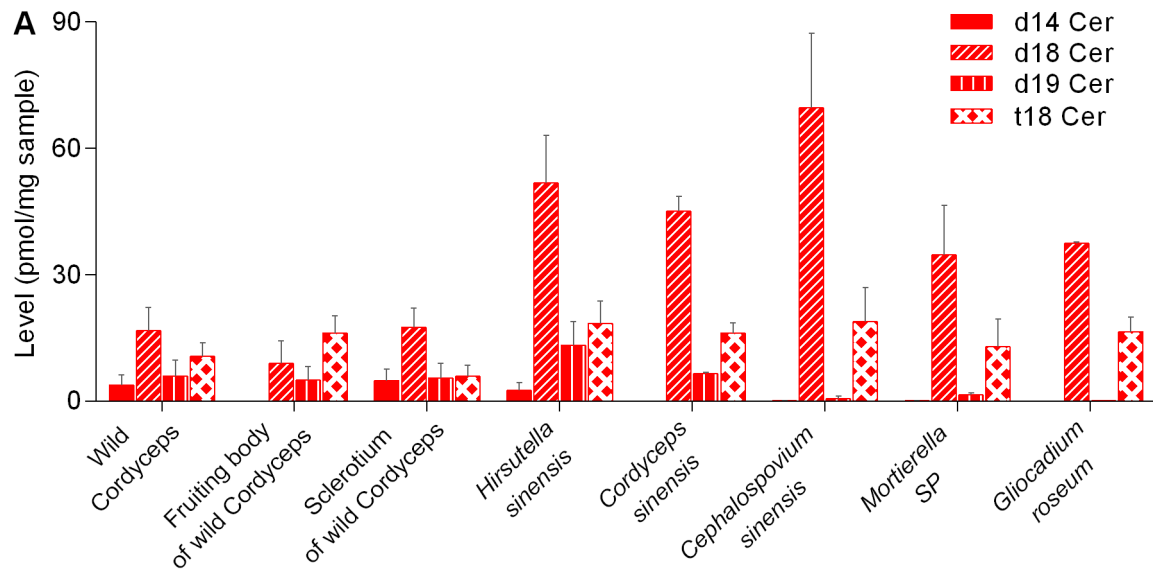

B

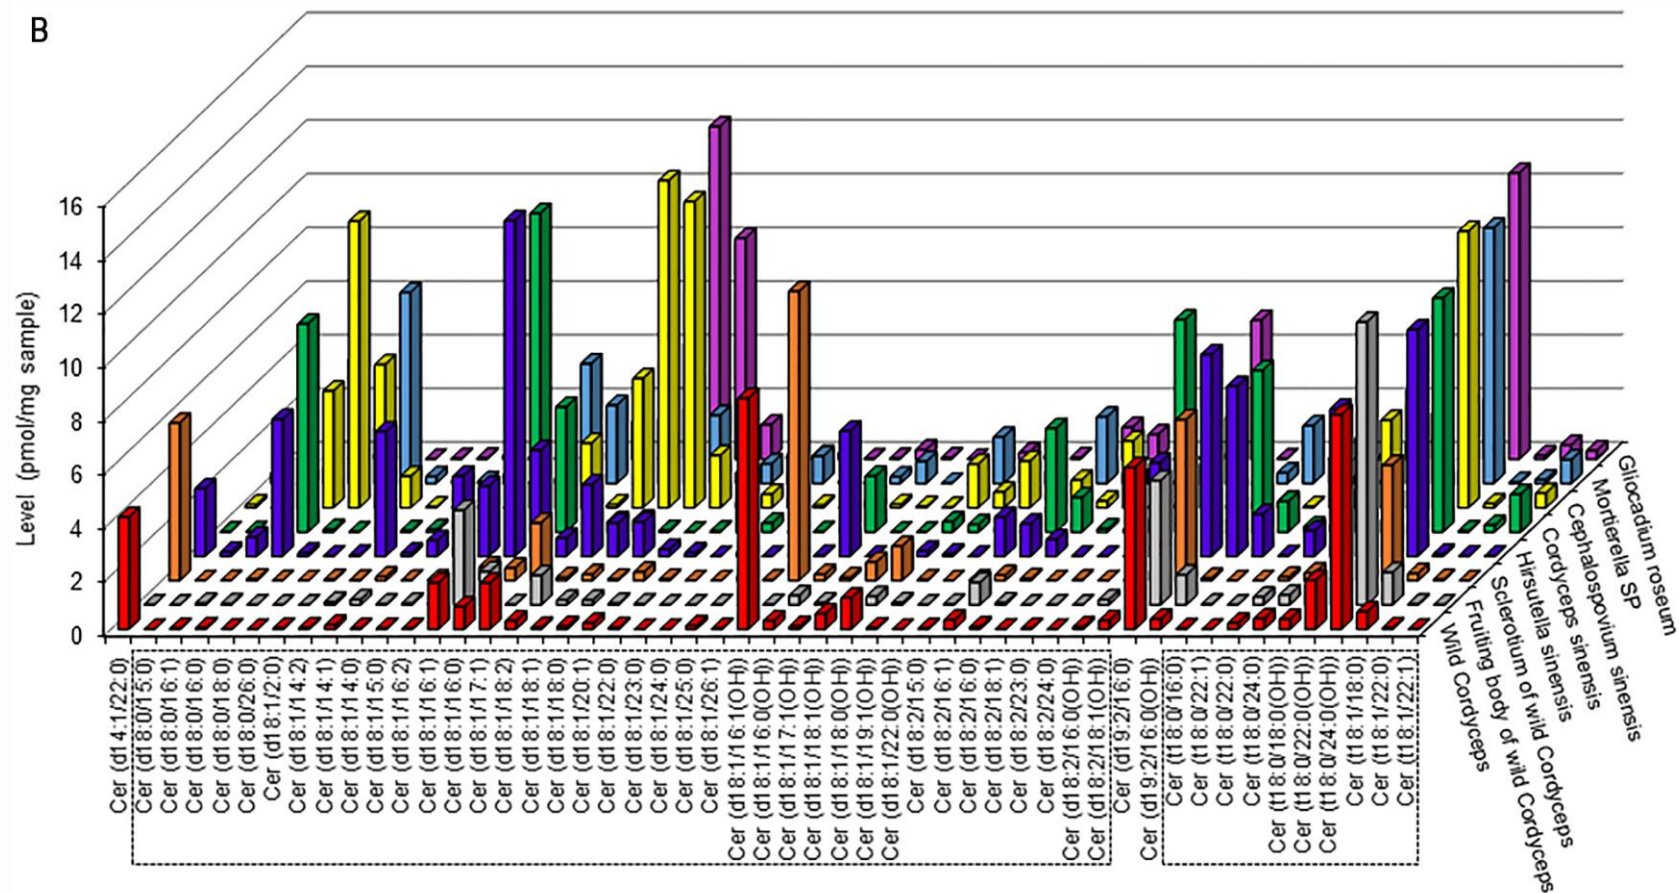

d14 Cer

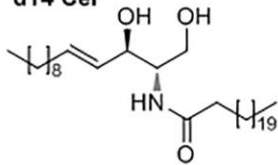

d18 Cer

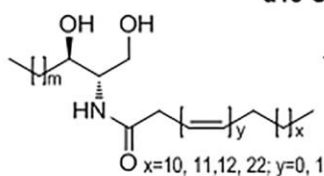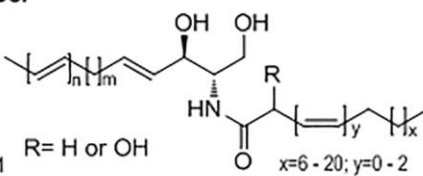

d19 Cer

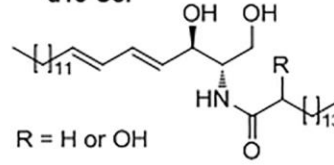

t18 Cer

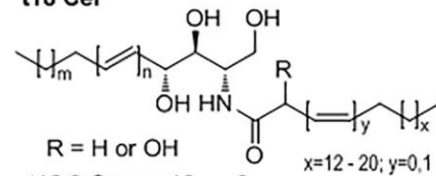

Figure S3. The total levels of glycosphingolipids (A, each bar represents mean  $\pm$  SD) and the levels of 8 glycosphingolipids (B, each bar represents mean value of individual glycosphingolipids) in wild Cordyceps and its mycelia.

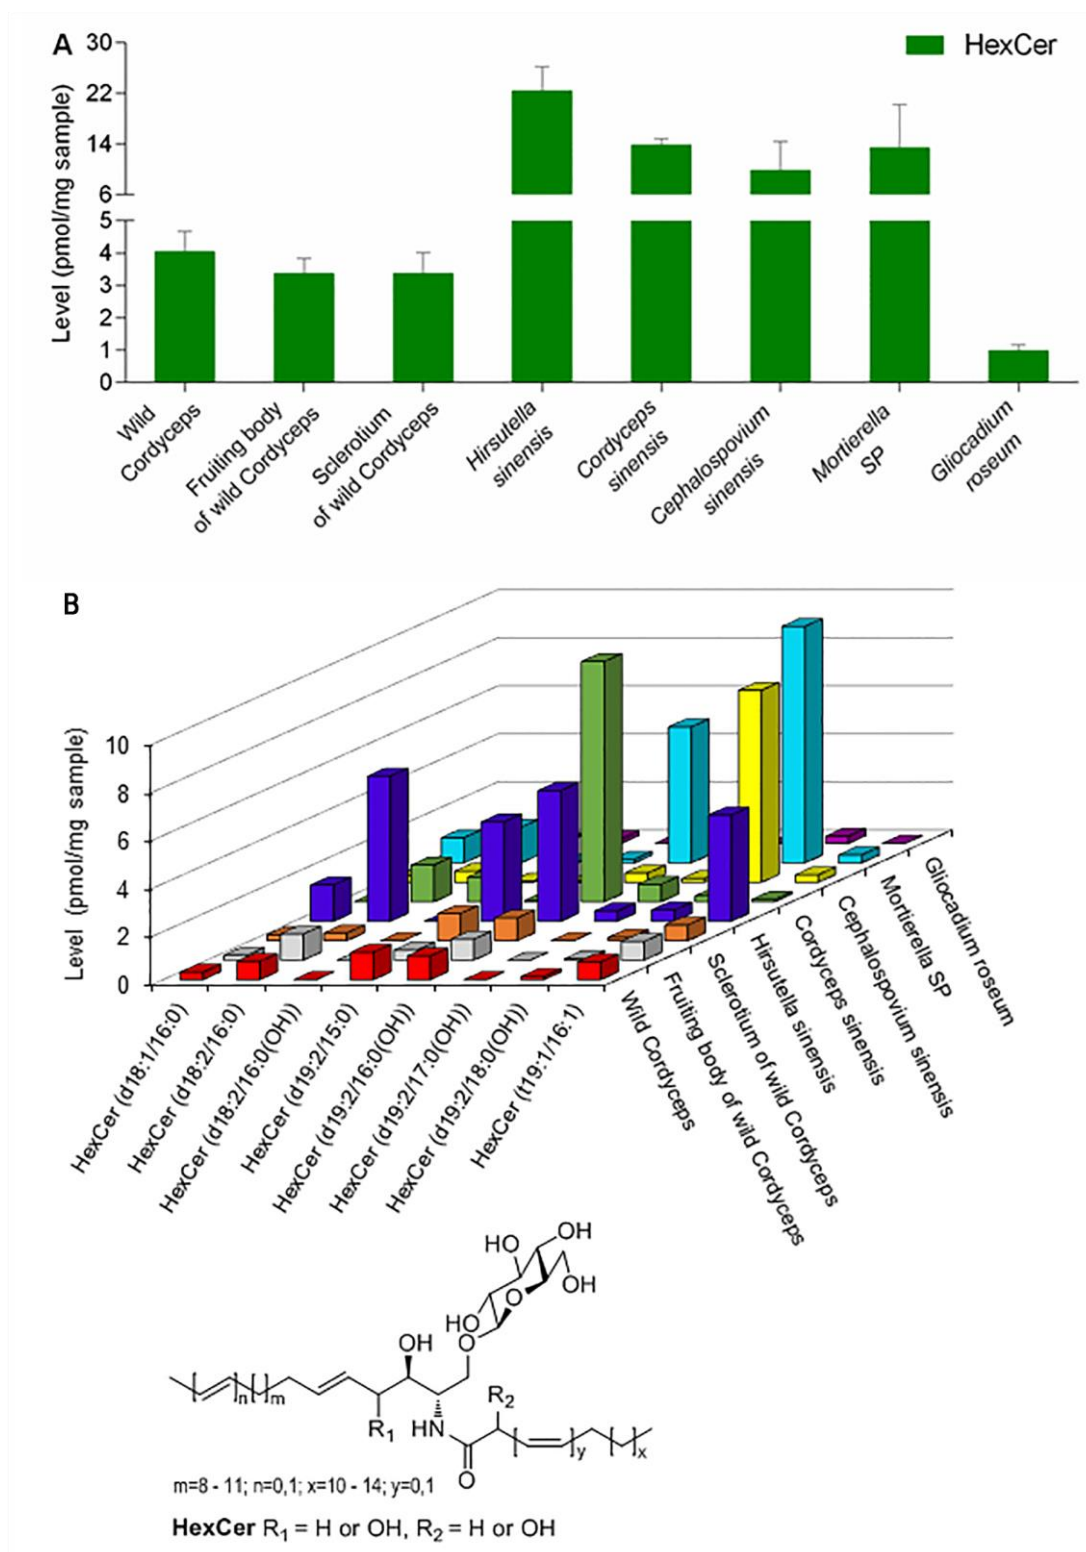

Supplement: srep20870-s1.pdf [file srep20870-s1.pdf]
